# Supplementary material
Source: PubMed Central journal article supplement (PMC4911621)
Supplement: cn5b00029_si_001.pdf [file cn5b00029_si_001.pdf]

## Supplementary Information

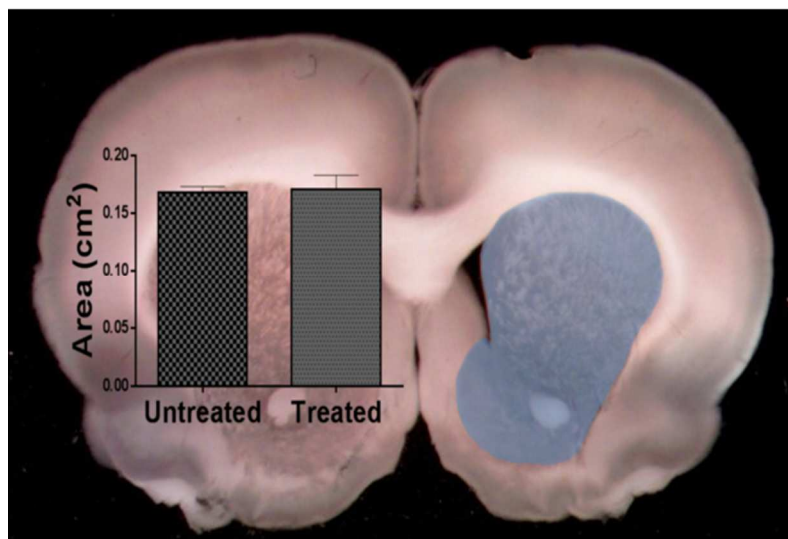

**Supplementary Figure 1.** Striatal area was unaffected in rats treated with carboplatin. (unpaired t-test,  $p > 0.05$ ,  $n = 6$  control rats and  $n = 5$  rats treated with 20 mg/kg carboplatin)

**Supplementary Table 1.** 2-way ANOVA Table for  $[DA]_{\max}$

|                            |                             |                |                        |                     |                |
|----------------------------|-----------------------------|----------------|------------------------|---------------------|----------------|
| <b>Two-way ANOVA</b>       | Ordinary                    |                |                        |                     |                |
| <b>Alpha</b>               | 0.05                        |                |                        |                     |                |
| <b>Source of Variation</b> | <b>% of total variation</b> | <b>P value</b> | <b>P value summary</b> | <b>Significant?</b> |                |
| Interaction                | 2.421                       | 0.9409         | ns                     | No                  |                |
| Treatment                  | 25.76                       | 0.0004         | ***                    | Yes                 |                |
| Region                     | 4.025                       | 0.424          | ns                     | No                  |                |
| <b>ANOVA table</b>         | <b>SS</b>                   | <b>DF</b>      | <b>MS</b>              | <b>F (DFn, DFd)</b> | <b>P value</b> |
| Interaction                | 2.252                       | 6              | 0.3754                 | F (6, 48) = 0.2857  | P = 0.9409     |
| Treatment                  | 23.96                       | 2              | 11.98                  | F (2, 48) = 9.120   | P = 0.0004     |
| Region                     | 3.744                       | 3              | 1.248                  | F (3, 48) = 0.9501  | P = 0.4240     |
| Residual                   | 63.06                       | 48             | 1.314                  |                     |                |

**Supplementary Table 2 .** 1-way ANOVA Table for  $[DA]_{\max}$  for combined brain regions.

|                                                                       |        |
|-----------------------------------------------------------------------|--------|
| ANOVA summary                                                         |        |
| F                                                                     | 9.889  |
| P value                                                               | 0.0002 |
| P value summary                                                       | ***    |
| Are differences among means statistically significant? ( $P < 0.05$ ) | Yes    |

|                                     |            |                   |              |         |
|-------------------------------------|------------|-------------------|--------------|---------|
| R square                            |            |                   | 0.2576       |         |
| Dunnett's multiple comparisons test | Mean Diff. | 95% CI of diff.   | Significant? | Summary |
| 0 vs. 5                             | 0.7425     | -0.04702 to 1.532 | No           | ns      |
| 0 vs. 20                            | 1.548      | 0.7580 to 2.337   | Yes          | ****    |

**Supplementary Table 3.** 2 way ANOVA Table for [DA]<sub>p</sub>

|                            |                             |                |                        |                     |                |
|----------------------------|-----------------------------|----------------|------------------------|---------------------|----------------|
| <b>Two-way ANOVA</b>       | Ordinary                    |                |                        |                     |                |
| <b>Alpha</b>               | 0.05                        |                |                        |                     |                |
|                            |                             |                |                        |                     |                |
| <b>Source of Variation</b> | <b>% of total variation</b> | <b>P value</b> | <b>P value summary</b> | <b>Significant?</b> |                |
| Interaction                | 2.676                       | 0.9297         | ns                     | No                  |                |
| Dose                       | 22.7                        | 0.0011         | **                     | Yes                 |                |
| Position                   | 5.151                       | 0.3249         | ns                     | No                  |                |
|                            |                             |                |                        |                     |                |
| <b>ANOVA table</b>         | <b>SS</b>                   | <b>DF</b>      | <b>MS</b>              | <b>F (DFn, DFd)</b> | <b>P value</b> |
| Interaction                | 2.422                       | 6              | 0.4037                 | F (6, 48) = 0.3081  | P = 0.9297     |
| Dose                       | 20.54                       | 2              | 10.27                  | F (2, 48) = 7.842   | P = 0.0011     |
| Position                   | 4.662                       | 3              | 1.554                  | F (3, 48) = 1.186   | P = 0.3249     |
| Residual                   | 62.88                       | 48             | 1.31                   |                     |                |

**Supplementary Table 4 .** 1-way ANOVA Table for [DA]<sub>p</sub> for combined brain regions.

|                                                                   |            |                  |              |         |
|-------------------------------------------------------------------|------------|------------------|--------------|---------|
| ANOVA summary                                                     |            |                  |              |         |
| F                                                                 |            | 7.345            |              |         |
| P value                                                           |            | 0.0011           |              |         |
| P value summary                                                   |            | **               |              |         |
| Are differences among means statistically significant? (P < 0.05) |            | Yes              |              |         |
| R square                                                          |            | 0.1292           |              |         |
| Dunnett's multiple comparisons test                               | Mean Diff. | 95% CI of diff.  | Significant? | Summary |
| 0 vs. 5                                                           | 0.8320     | 0.03738 to 1.627 | Yes          | *       |
| 0 vs. 20                                                          | 1.427      | 0.6321 to 2.221  | Yes          | ***     |

**Supplementary Table 5.** 2 way ANOVA Table for V<sub>max</sub>

|                      |          |  |  |  |  |
|----------------------|----------|--|--|--|--|
| <b>Two-way ANOVA</b> | Ordinary |  |  |  |  |
| <b>Alpha</b>         | 0.05     |  |  |  |  |

| Source of Variation | % of total variation | P value | P value summary | Significant?       |            |  |
|---------------------|----------------------|---------|-----------------|--------------------|------------|--|
| Interaction         | 2.702                | 0.9156  | ns              | No                 |            |  |
| Dose                | 26.92                | 0.0002  | ***             | Yes                |            |  |
| Position            | 5.688                | 0.2523  | ns              | No                 |            |  |
|                     |                      |         |                 |                    |            |  |
| ANOVA table         | SS                   | DF      | MS              | F (DFn, DFd)       | P value    |  |
| Interaction         | 15.92                | 6       | 2.654           | F (6, 48) = 0.3341 | P = 0.9156 |  |
| Dose                | 158.6                | 2       | 79.32           | F (2, 48) = 9.985  | P = 0.0002 |  |
| Position            | 33.53                | 3       | 11.18           | F (3, 48) = 1.407  | P = 0.2523 |  |
| Residual            | 381.3                | 48      | 7.944           |                    |            |  |

**Supplementary Table 6 .** 1-way ANOVA Table for  $V_{max}$  for combined brain regions.

| ANOVA summary                                                     |            |                 |              |         |
|-------------------------------------------------------------------|------------|-----------------|--------------|---------|
| F                                                                 |            |                 | 10.50        |         |
| P value                                                           |            |                 | 0.0001       |         |
| P value summary                                                   |            |                 | ***          |         |
| Are differences among means statistically significant? (P < 0.05) |            |                 | Yes          |         |
| R square                                                          |            |                 | 0.2692       |         |
| Dunnett's multiple comparisons test                               | Mean Diff. | 95% CI of diff. | Significant? | Summary |
| 0 vs. 5                                                           | 3.519      | 1.547 to 5.491  | Yes          | ***     |
| 0 vs. 20                                                          | 3.376      | 1.404 to 5.347  | Yes          | ***     |

**Supplementary Table 7.** Non-linear fit of spatial learning paradigm data

|                                          |       |       |                                          |
|------------------------------------------|-------|-------|------------------------------------------|
| Comparison of Fits                       |       |       |                                          |
| Null hypothesis                          |       |       | 2 parameters same for all data sets      |
| Alternative hypothesis                   |       |       | 2 parameters different for each data set |
| P value                                  |       |       | 0.0171                                   |
| Conclusion (alpha = 0.05)                |       |       | Reject null hypothesis                   |
| Preferred model                          |       |       | 2 parameters different for each data set |
| F (DFn, DFd)                             |       |       | 4.339 (2,64)                             |
|                                          |       |       |                                          |
| 2 parameters different for each data set |       |       |                                          |
| Best-fit values                          |       |       |                                          |
| Amplitude                                | 1.001 | 1.000 |                                          |

|                                     |                  |                  |                  |
|-------------------------------------|------------------|------------------|------------------|
| Mean                                | 3.023            | 3.028            |                  |
| SD                                  | 0.5243           | 0.5857           |                  |
| Std. Error                          |                  |                  |                  |
| Amplitude                           | 0.01723          | 0.02774          |                  |
| Mean                                | 0.02055          | 0.02878          |                  |
| SD                                  | 0.01112          | 0.01785          |                  |
| 95% Confidence Intervals            |                  |                  |                  |
| Amplitude                           | 0.9657 to 1.036  | 0.9438 to 1.057  |                  |
| Mean                                | 2.981 to 3.065   | 2.969 to 3.087   |                  |
| SD                                  | 0.5016 to 0.5469 | 0.5493 to 0.6220 |                  |
| Goodness of Fit                     |                  |                  |                  |
| Degrees of Freedom                  | 32               | 32               |                  |
| R square                            | 0.9862           | 0.9623           |                  |
| Absolute Sum of Squares             | 0.06577          | 0.1710           |                  |
| Sy.x                                | 0.04533          | 0.07310          |                  |
| Constraints                         |                  |                  |                  |
| SD                                  | SD > 0.0         | SD > 0.0         |                  |
|                                     |                  |                  |                  |
| 2 parameters same for all data sets |                  |                  |                  |
| Best-fit values                     |                  |                  |                  |
| Amplitude                           | 0.9878           | 1.013            |                  |
| Mean                                | 3.025            | 3.025            | 3.025            |
| SD                                  | 0.5553           | 0.5553           | 0.5553           |
| Std. Error                          |                  |                  |                  |
| Amplitude                           | 0.02373          | 0.02376          |                  |
| Mean                                | 0.01882          | 0.01882          | 0.01882          |
| SD                                  | 0.01092          | 0.01092          | 0.01092          |
| 95% Confidence Intervals            |                  |                  |                  |
| Amplitude                           | 0.9404 to 1.035  | 0.9659 to 1.061  |                  |
| Mean                                | 2.988 to 3.063   | 2.988 to 3.063   | 2.988 to 3.063   |
| SD                                  | 0.5335 to 0.5771 | 0.5335 to 0.5771 | 0.5335 to 0.5771 |
| Goodness of Fit                     |                  |                  |                  |
| Degrees of Freedom                  |                  |                  | 66               |
| R square                            | 0.9828           | 0.9588           | 0.9712           |
| Absolute Sum of Squares             | 0.08212          | 0.1868           | 0.2689           |
| Sy.x                                |                  |                  | 0.06383          |
| Constraints                         |                  |                  |                  |
| Mean                                | Mean is shared   | Mean is shared   |                  |

|                  |                     |                     |  |
|------------------|---------------------|---------------------|--|
| SD               | SD > 0.0 and shared | SD > 0.0 and shared |  |
|                  |                     |                     |  |
| Number of points |                     |                     |  |
| Analyzed         | 35                  | 35                  |  |

**Supplementary Table 8.** 1-way repeated measures ANOVA Table for the 20mg/kg group over the 4 week treatment period.

|                                       |        |
|---------------------------------------|--------|
| Repeated measures ANOVA summary       |        |
| Assume sphericity?                    | No     |
| F                                     | 116.0  |
| P value                               | 0.0059 |
| P value summary                       | **     |
| Statistically significant (P < 0.05)? | Yes    |
| Geisser-Greenhouse's epsilon          | 0.3693 |
| R square                              | 0.9831 |
